# Supplementary material for: Single-cell gene profiling defines differential progenitor subclasses in mammalian neurogenesis
Source: Oxford University Press journal article supplement (doi:10.1242/dev.022616), 2008-08-25
Supplement: dev022616tables1.pdf [file dev022616tables1.pdf]

| Table S1. SigABC probe sets |              |              |                      |                                                                                                                                       |
|-----------------------------|--------------|--------------|----------------------|---------------------------------------------------------------------------------------------------------------------------------------|
| Probe set ID                | P-value      | FDR          | Gene symbol          | Gene title                                                                                                                            |
| 1422839_at                  | "24869E-14"  | "112162E-09" | <i>Neurog2</i>       | neurogenin 2                                                                                                                          |
| 1418102_at                  | "226681E-11" | "511177E-07" | <i>Hes1</i>          | hairy and enhancer of split 1 (Drosophila)                                                                                            |
| 1426964_at                  | "818446E-10" | "123042E-05" | <i>3110003A17Rik</i> | RIKEN cDNA 3110003A17 gene                                                                                                            |
| 1453851_a_at                | "219884E-09" | "247924E-05" | <i>Gadd45g</i>       | growth arrest and DNA-damage-inducible 45 gamma                                                                                       |
| 1435172_at                  | "108242E-08" | "976361E-05" | <i>Eomes</i>         | eomesodermin homolog (Xenopus laevis)                                                                                                 |
| 1416992_at                  | "262702E-08" | "0000197469" | <i>Mfng</i>          | manic fringe homolog (Drosophila)                                                                                                     |
| 1424711_at                  | "610067E-08" | "0000393066" | <i>Tmem2</i>         | transmembrane protein 2                                                                                                               |
| 1421399_at                  | "136941E-07" | "000077202"  | <i>Insm1</i>         | insulinoma-associated 1                                                                                                               |
| 1452779_at                  | "7663E-07"   | "0003456088" | <i>3110006E14Rik</i> | RIKEN cDNA 3110006E14 gene                                                                                                            |
| 1444664_at                  | "753839E-07" | "0003456088" | <i>Igsf4d</i>        | Immunoglobulin superfamily, member 4                                                                                                  |
| 1455865_at                  | "137964E-06" | "0003456841" | <i>Insm1</i>         | insulinoma-associated 1                                                                                                               |
| 1455537_at                  | "108561E-06" | "0003456841" | <i>6430547I21Rik</i> | RIKEN cDNA 6430547I21 gene                                                                                                            |
| 1450258_a_at                | "112466E-06" | "0003456841" | <i>Elavl4</i>        | ELAV (embryonic lethal, abnormal vision, Drosophila)-like 4 (Hu antigen D)                                                            |
| 1437239_x_at                | "130839E-06" | "0003456841" | <i>Phc2</i>          | polyhomeotic-like 2 (Drosophila)                                                                                                      |
| 1431826_a_at                | "137107E-06" | "0003456841" | <i>Brsk2</i>         | BR serine/threonine kinase 2                                                                                                          |
| 1426761_at                  | "854864E-07" | "0003456841" | <i>Aof2</i>          | amine oxidase (flavin containing) domain 2                                                                                            |
| 1423474_at                  | "133737E-06" | "0003456841" | <i>Top1</i>          | topoisomerase (DNA) I                                                                                                                 |
| 1416048_at                  | "129874E-06" | "0003456841" | <i>Phc2</i>          | polyhomeotic-like 2 (Drosophila)                                                                                                      |
| 1434531_at                  | "16259E-06"  | "0003859449" | <i>Mgat5b</i>        | mannoside acetylglucosaminyltransferase 5, isoenzyme B                                                                                |
| 1416107_at                  | "203535E-06" | "0004589818" | <i>Nsg2</i>          | neuron specific gene family member 2                                                                                                  |
| 1450042_at                  | "218013E-06" | "0004682197" | <i>Arx</i>           | aristaless related homeobox gene (Drosophila)                                                                                         |
| 1454742_at                  | "242359E-06" | "0004968464" | <i>Rasgef1b</i>      | RasGEF domain family, member 1B                                                                                                       |
| 1452894_at                  | "413467E-06" | "000810772"  | <i>Elavl4</i>        | ELAV (embryonic lethal, abnormal vision, Drosophila)-like 4 (Hu antigen D)                                                            |
| 1450644_at                  | "537333E-06" | "0009320865" | <i>Zfp361</i>        | zinc finger protein 36, C3H type-like 1                                                                                               |
| 1421344_a_at                | "519493E-06" | "0009320865" | <i>Jub</i>           | ajuba                                                                                                                                 |
| 1418047_at                  | "528599E-06" | "0009320865" | <i>Neurod6</i>       | neurogenic differentiation 6                                                                                                          |
| 1455267_at                  | "60077E-06"  | "0009620595" | <i>Esrrg</i>         | estrogen-related receptor gamma                                                                                                       |
| 1438093_x_at                | "626233E-06" | "0009620595" | <i>Dbi</i>           | diazepam binding inhibitor                                                                                                            |
| 1429582_at                  | "587016E-06" | "0009620595" | <i>Btbd14a</i>       | BTB (POZ) domain containing 14A                                                                                                       |
| 1422256_at                  | "639937E-06" | "0009620595" | <i>Sstr2</i>         | somatostatin receptor 2                                                                                                               |
| 1422773_at                  | "69207E-06"  | "0010068724" | <i>Myt1</i>          | myelin transcription factor 1                                                                                                         |
| 1422432_at                  | "724196E-06" | "0010206866" | <i>Dbi</i>           | diazepam binding inhibitor                                                                                                            |
| 1452646_at                  | "788242E-06" | "0010772881" | <i>Trp53inp2</i>     | tumor protein p53 inducible nuclear protein 2                                                                                         |
| 1449577_x_at                | "109135E-05" | "0014476762" | <i>Tpm2</i>          | tropomyosin 2, beta                                                                                                                   |
| 1418271_at                  | "116359E-05" | "001499405"  | <i>Bhlhb5</i>        | basic helix-loop-helix domain containing, class B5                                                                                    |
| 1460587_at                  | "137766E-05" | "0016439567" | <i>B230215L15Rik</i> | RIKEN cDNA B230215L15 gene                                                                                                            |
| 1456344_at                  | "138512E-05" | "0016439567" | <i>Tnc</i>           | Tenascin C                                                                                                                            |
| 1433575_at                  | "137506E-05" | "0016439567" | <i>LOC672274</i>     | similar to Transcription factor SOX-4                                                                                                 |
| 1451190_a_at                | "169556E-05" | "0018362197" | <i>Sbk1</i>          | SH3-binding kinase 1                                                                                                                  |
| 1435772_at                  | "170997E-05" | "0018362197" | <i>Kif21b</i>        | kinesin family member 21B                                                                                                             |
| 1435411_at                  | "162428E-05" | "0018362197" | -                    | Transcribed locus                                                                                                                     |
| 1418003_at                  | "169753E-05" | "0018362197" | <i>1190002H23Rik</i> | RIKEN cDNA 1190002H23 gene                                                                                                            |
| 1456482_at                  | "189094E-05" | "0018951837" | <i>Pik3r3</i>        | phosphatidylinositol 3 kinase, regulatory subunit, polypeptide 3 (p55)                                                                |
| 1439500_at                  | "181161E-05" | "0018951837" | -                    | -                                                                                                                                     |
| 1435577_at                  | "188999E-05" | "0018951837" | <i>Dab1</i>          | disabled homolog 1 (Drosophila)                                                                                                       |
| 1456321_at                  | "222918E-05" | "0020505701" | <i>Npal1</i>         | NIPA-like domain containing 1                                                                                                         |
| 1455976_x_at                | "218095E-05" | "0020505701" | <i>Dbi</i>           | diazepam binding inhibitor                                                                                                            |
| 1450622_at                  | "212059E-05" | "0020505701" | <i>Bcar1</i>         | breast cancer anti-estrogen resistance 1                                                                                              |
| 1436246_at                  | "218392E-05" | "0020505701" | -                    | Adult male medulla oblongata cDNA, RIKEN full-length enriched library, clone:6330566A22 product: unclassifiable, full insert sequence |
| 1427307_a_at                | "227331E-05" | "0020505701" | <i>Dab1</i>          | disabled homolog 1 (Drosophila)                                                                                                       |
| 1416828_at                  | "255955E-05" | "002263499"  | <i>Snap25</i>        | synaptosomal-associated protein 25                                                                                                    |
| 1455556_at                  | "274117E-05" | "0022894378" | <i>Notch2</i>        | Notch gene homolog 2 (Drosophila)                                                                                                     |
| 1435578_s_at                | "272542E-05" | "0022894378" | <i>Dab1</i>          | disabled homolog 1 (Drosophila)                                                                                                       |
| 1418497_at                  | "271565E-05" | "0022894378" | <i>Fgf13</i>         | fibroblast growth factor 13                                                                                                           |
| 1452114_s_at                | "282049E-05" | "0023128569" | <i>Igfbp5</i>        | insulin-like growth factor binding protein 5                                                                                          |
| 1435192_at                  | "34591E-05"  | "0027858757" | <i>Sox3</i>          | SRY-box containing gene 3                                                                                                             |
| 1439093_at                  | "362493E-05" | "0028682089" | <i>Hspa4l</i>        | Heat shock protein 4 like                                                                                                             |
| 1455426_at                  | "395563E-05" | "0028774669" | -                    | -                                                                                                                                     |
| 1440745_at                  | "388008E-05" | "0028774669" | <i>Prdm16</i>        | PR domain containing 16                                                                                                               |
| 1436010_at                  | "382444E-05" | "0028774669" | <i>BC036313</i>      | cDNA sequence BC036313                                                                                                                |

|              |              |              |                             |                                                                                                                   |
|--------------|--------------|--------------|-----------------------------|-------------------------------------------------------------------------------------------------------------------|
| 1429674_at   | "38589E-05"  | "0028774669" | 1700113H08Rik               | RIKEN cDNA 1700113H08 gene                                                                                        |
| 1426001_at   | "39388E-05"  | "0028774669" | <i>Eomes</i>                | eomesodermin homolog ( <i>Xenopus laevis</i> )                                                                    |
| 1452979_at   | "406111E-05" | "0029073045" | 2610110G12Rik               | RIKEN cDNA 2610110G12 gene                                                                                        |
| 1438511_a_at | "428363E-05" | "0030186861" | 1190002H23Rik               | RIKEN cDNA 1190002H23 gene                                                                                        |
| 1455037_at   | "473548E-05" | "0031880657" | <i>Plxna2</i>               | plexin A2                                                                                                         |
| 1454877_at   | "487742E-05" | "0031880657" | <i>Sertad4</i>              | SERTA domain containing 4                                                                                         |
| 1433991_x_at | "476285E-05" | "0031880657" | <i>Dbi</i>                  | diazepam binding inhibitor                                                                                        |
| 1426762_s_at | "484473E-05" | "0031880657" | <i>Aof2</i>                 | amine oxidase (flavin containing) domain 2                                                                        |
| 1418025_at   | "472838E-05" | "0031880657" | <i>Bhlhb2</i>               | basic helix-loop-helix domain containing, class B2                                                                |
| 1428741_at   | "501933E-05" | "0032339574" | <i>Elavl4</i>               | ELAV (embryonic lethal, abnormal vision, <i>Drosophila</i> )-like 4 (Hu antigen D)                                |
| 1441899_x_at | "556171E-05" | "0035329415" | <i>Bcan</i>                 | Brevican                                                                                                          |
| 1433988_s_at | "588319E-05" | "0036256871" | C230098O21Rik               | RIKEN cDNA C230098O21 gene                                                                                        |
| 1433759_at   | "594889E-05" | "0036256871" | <i>Dpy19l1</i>              | dpy-19-like 1 ( <i>C. elegans</i> )                                                                               |
| 1416021_a_at | "584597E-05" | "0036256871" | <i>Fabp5</i>                | fatty acid binding protein 5, epidermal                                                                           |
| 1448162_at   | "618342E-05" | "003718377"  | <i>Vcam1</i>                | vascular cell adhesion molecule 1                                                                                 |
| 1422997_s_at | "649786E-05" | "0038560519" | <i>Acot1 / Acot2</i>        | acyl-CoA thioesterase 1 / acyl-CoA thioesterase 2                                                                 |
| 1455156_at   | "717147E-05" | "004104403"  | <i>Strn</i>                 | striatin, calmodulin binding protein                                                                              |
| 1434889_at   | "737138E-05" | "004104403"  | <i>Plekha7</i>              | pleckstrin homology domain containing, family A member 7                                                          |
| 1426195_a_at | "714205E-05" | "004104403"  | <i>Cst3</i>                 | cystatin C                                                                                                        |
| 1423175_s_at | "731349E-05" | "004104403"  | <i>Pard6b</i>               | par-6 (partitioning defective 6) homolog beta ( <i>C. elegans</i> )                                               |
| 1420911_a_at | "728092E-05" | "004104403"  | <i>Mfge8</i>                | milk fat globule-EGF factor 8 protein                                                                             |
| 1437185_s_at | "817259E-05" | "0044408689" | <i>Tmsb10</i>               | thymosin, beta 10                                                                                                 |
| 1427019_at   | "816172E-05" | "0044408689" | <i>Ptprz1</i>               | protein tyrosine phosphatase, receptor type Z, polypeptide 1                                                      |
| 1433730_at   | "925664E-05" | "004970045"  | <i>Elmod2</i>               | ELMO domain containing 2                                                                                          |
| 1448396_at   | "952268E-05" | "0050527358" | <i>Tmem131</i>              | transmembrane protein 131                                                                                         |
| 1436902_x_at | "974481E-05" | "0050770236" | <i>Tmsb10</i>               | thymosin, beta 10                                                                                                 |
| 1423532_at   | "97936E-05"  | "0050770236" | <i>Rnf44</i>                | ring finger protein 44                                                                                            |
| 1416039_x_at | "0000101747" | "0052146634" | <i>Cyr61</i>                | cysteine rich protein 61                                                                                          |
| 1446973_at   | "0000112448" | "0056983422" | 5730405I09Rik               | RIKEN cDNA 5730405I09 gene                                                                                        |
| 1448147_at   | "0000120814" | "0060542817" | <i>Tnfrsf19</i>             | tumor necrosis factor receptor superfamily, member 19                                                             |
| 1422150_at   | "0000124815" | "0061860115" | <i>Hmx3</i>                 | H6 homeo box 3                                                                                                    |
| 1454196_at   | "0000130542" | "0063995549" | 4930568A13Rik               | RIKEN cDNA 4930568A13 gene                                                                                        |
| 1427993_at   | "0000132123" | "0064073999" | <i>Rufy2</i>                | RUN and FYVE domain-containing 2                                                                                  |
| 1449093_at   | "0000133875" | "006423296"  | <i>Ctf1</i>                 | cardiotrophin 1                                                                                                   |
| 1437347_at   | "0000137702" | "0065373634" | <i>Ednrb</i>                | endothelin receptor type B                                                                                        |
| 1431491_at   | "000014668"  | "006829018"  | 9430087N24Rik               | RIKEN cDNA 9430087N24 gene                                                                                        |
| 1422695_at   | "0000146874" | "006829018"  | <i>Ttyh1 / Taf1</i>         | tweety homolog 1 ( <i>Drosophila</i> ) / TAF1 RNA polymerase II, TATA box binding protein (TBP)-associated factor |
| 1416055_at   | "0000150232" | "006913878"  | <i>Amy2 / 1810008N23Rik</i> | amylase 2, pancreatic / RIKEN cDNA 1810008N23 gene                                                                |
| 1426231_at   | "0000154106" | "0070205206" | <i>Vit</i>                  | vitrin                                                                                                            |
| 1418675_at   | "0000166781" | "0075219949" | <i>Osmr</i>                 | oncostatin M receptor                                                                                             |
| 1452758_s_at | "0000174709" | "0076500599" | <i>Eif4g2</i>               | eukaryotic translation initiation factor 4, gamma 2                                                               |
| 1448295_at   | "0000173721" | "0076500599" | <i>D13Wsu50e</i>            | DNA segment, Chr 13, Wayne State University 50, expressed                                                         |
| 1433939_at   | "0000172078" | "0076500599" | <i>A730046J16</i>           | hypothetical protein A730046J16                                                                                   |
| 1438680_at   | "0000206097" | "0089376565" | <i>Auts2</i>                | autism susceptibility candidate 2                                                                                 |
| 1453304_s_at | "0000208356" | "008949606"  | <i>Ly6e</i>                 | lymphocyte antigen 6 complex, locus E                                                                             |
| 1453162_at   | "0000219084" | "0092501292" | <i>Utp11</i>                | UTP11-like, U3 small nucleolar ribonucleoprotein, (yeast)                                                         |
| 1436050_x_at | "0000221506" | "0092501292" | <i>Hes6</i>                 | hairy and enhancer of split 6 ( <i>Drosophila</i> )                                                               |
| 1415863_at   | "0000220083" | "0092501292" | <i>Eif4g2</i>               | eukaryotic translation initiation factor 4, gamma 2                                                               |
| 1456387_at   | "0000227115" | "0093973651" | <i>Nol4</i>                 | nucleolar protein 4                                                                                               |
| 1448238_at   | "0000232919" | "0095499006" | 2700060E02Rik               | RIKEN cDNA 2700060E02 gene                                                                                        |
| 1459185_at   | "0000235521" | "0095695783" | <i>Npat</i>                 | Nuclear protein in the AT region                                                                                  |
| 1450175_a_at | "0000239878" | "0096595889" | <i>Ctsm</i>                 | cathepsin M                                                                                                       |
| 1456509_at   | "0000245807" | "0098107464" | 1110032F04Rik               | RIKEN cDNA 1110032F04 gene                                                                                        |
| 1460419_a_at | "0000248519" | "0098319735" | <i>Prkcb1</i>               | protein kinase C, beta 1                                                                                          |

We compared Group A, B and C cells and determined which probe sets showed significantly different expression levels between any two groups ( $n=114$  probe sets, ANOVA,  $FDR<0.1$ ). Since Groups A, B and C cells were all progenitors in apparently distinct differential states, we interpreted these probe sets (SigABC genes) as distinguishing progenitor cells that were undergoing differentiation, but not simply proliferative cells from post-mitotic cells.
