# Supplementary material for: Single-cell gene profiling defines differential progenitor subclasses in mammalian neurogenesis
Source: Oxford University Press journal article supplement (doi:10.1242/dev.022616), 2008-08-25
Supplement: dev022616tables2.pdf [file dev022616tables2.pdf]

**Table S2. Probe regions for RNA in situ hybridization**

| Gene                          | Affymetrix ID | GenBank No. | Regions used for probes |
|-------------------------------|---------------|-------------|-------------------------|
| <i>2600003E23Rik (Afap1)</i>  | 1436729_at    | AK147706    | 385-1434                |
| <i>4933402J24Rik (Rlbp11)</i> | 1433906_at    | AK016622    | 110-1258                |
| <i>9430087N24Rik</i>          | 1431491_at    | AK020153    | 355-1107                |
| <i>A730054J21Rik</i>          | 1438531_at    | AK043086    | 1093-1815               |
| <i>AI504432</i>               | 1455161_at    | AK039146    | 49-1064                 |
| <i>BC036313</i>               | 1436010_at    | AK148355    | 1426-2456               |
| <i>C230098O21Rik</i>          | 1433988_s_at  | AK082735    | 430-1541                |
| <i>Ccdc80</i>                 | 1424186_at    | AK011256    | 121-1152                |
| <i>Cxcl12</i>                 | 1417574_at    | NM013655    | 863-1952                |
| <i>Dll1</i>                   | 1419204_at    | BC057400    | 1276-2343               |
| <i>Dll3</i>                   | 1449236_at    | AK144282    | 722-1898                |
| <i>Egfp</i>                   | –             | U55762      | 752-1391                |
| <i>Elav2 (HuB)</i>            | 1421882_a_at  | NM010486    | 1178-2172               |
| <i>Elav4 (HuD)</i>            | 1452894_at    | AK014133    | 1211-2511               |
| <i>Fkbp9</i>                  | 1423677_at    | AK007499    | 13-1118                 |
| <i>Gadd45g</i>                | 1453851_a_at  | AK007410    | 30-1052                 |
| <i>Insml</i>                  | 1421399_at    | BC051240    | 855-1861                |
| <i>Lrp8</i>                   | 1440882_at    | AK030143    | 408-1525                |
| <i>Lrrn3 (NLRR-3)</i>         | 1434539_at    | AK036316    | 48-1210                 |
| <i>Mfge8</i>                  | 1420911_a_at  | BC003904    | 209-1245                |
| <i>Mgat5b</i>                 | 1434531_at    | AK049266    | 10-1076                 |
| <i>Myt1</i>                   | 1422773_at    | BC063252    | 1504-2534               |
| <i>Rwdd3</i>                  | 1430167_a_at  | AK014130    | 14-869                  |
| <i>Sdc3</i>                   | 1450027_at    | AK150120    | 39-1238                 |
| <i>Sertad4</i>                | 1454877_at    | AK047877    | 46-1203                 |
| <i>Sorbs2</i>                 | 1441624_at    | AK140498    | 443-1460                |
| <i>Sstr2</i>                  | 1422256_at    | NM009217    | 703-1804                |
| <i>Svet1</i>                  | –             | AF323987    | 2622-3243               |
| <i>Tbr2 (Eomes)</i>           | 1426001_at    | AK089817    | 1660-2376               |
| <i>Trp53inp1</i>              | 1416926_at    | AK038212    | 97-1195                 |
| <i>Trp53inp2</i>              | 1452646_at    | BC036958    | 327-1434                |
| <i>Ttyh1</i>                  | 1422695_at    | AK018148    | 1848-2823               |
| <i>Uaca</i>                   | 1452985_at    | BC042415    | 1832-2975               |
| <i>Vcam1</i>                  | 1448162_at    | BC029823    | 2015-3217               |
| <i>Ccnb1 (cyclin B1)</i>      | 1419943_s_at  | AK136259    | 1163-2244               |
| <i>Ccnb2 (cyclin B2)</i>      | 1450920_at    | AK076122    | 500-1322                |
| <i>Cdc20</i>                  | 1439377_x_at  | AK076030    | 521-1662                |
| <i>Mcm2</i>                   | 1448777_at    | AK088156    | 239-1320                |
| <i>Rpa2</i>                   | 1416433_at    | AK168680    | 347-1781                |
